# Supplementary material for: A Global Study on the Correlates of Gross Domestic Product (GDP) and COVID-19 Vaccine Distribution
Source: MDPI journal article supplement (doi:10.3390/vaccines10020266), 2022-02-10
Supplement: s1 [file s1]

Table S1. R-Studio Project files including R-code and raw data used in the analysis

| Country                      | Continent     | GDP per capita | People Vaccinated (%) |
|------------------------------|---------------|----------------|-----------------------|
| Afghanistan                  | Asia          | 1803.987       | 11.04                 |
| Albania                      | Europe        | 11803.431      | 39.39                 |
| Algeria                      | Africa        | 13913.839      | 15.73                 |
| Angola                       | Africa        | 5819.495       | 21.88                 |
| Antigua and Barbuda          | North America | 21490.943      | 62.95                 |
| Argentina                    | South America | 18933.907      | 82.98                 |
| Armenia                      | Asia          | 8787.58        | 30.45                 |
| Aruba                        | North America | 35973.781      | 78.84                 |
| Australia                    | Oceania       | 44648.71       | 79.09                 |
| Austria                      | Europe        | 45436.686      | 72.84                 |
| Azerbaijan                   | Asia          | 15847.419      | 50.41                 |
| Bahamas                      | North America | 27717.847      | 39.23                 |
| Bahrain                      | Asia          | 43290.705      | 68.57                 |
| Bangladesh                   | Asia          | 3523.984       | 52.64                 |
| Barbados                     | North America | 16978.068      | 54.03                 |
| Belarus                      | Europe        | 17167.967      | 46.13                 |
| Belgium                      | Europe        | 42658.576      | 76.51                 |
| Belize                       | North America | 7824.362       | 56.73                 |
| Benin                        | Africa        | 2064.236       | 12.54                 |
| Bermuda                      | North America | 50669.315      | 74.4                  |
| Bhutan                       | Asia          | 8708.597       | 75.62                 |
| Bolivia                      | South America | 6885.829       | 46.06                 |
| Bosnia and Herzegovina       | Europe        | 11713.895      | 25.53                 |
| Botswana                     | Africa        | 15807.374      | 47.21                 |
| Brazil                       | South America | 14103.452      | 77.52                 |
| Brunei                       | Asia          | 71809.251      | 91.75                 |
| Bulgaria                     | Europe        | 18563.307      | 15.79                 |
| Burkina Faso                 | Africa        | 1703.102       | 4.52                  |
| Burundi                      | Africa        | 702.225        | 0.03                  |
| Cambodia                     | Asia          | 3645.07        | 84.03                 |
| Cameroon                     | Africa        | 3364.926       | 2.96                  |
| Canada                       | North America | 44017.591      | 83.11                 |
| Cape Verde                   | Africa        | 6222.554       | 53.89                 |
| Cayman Islands               | North America | 49903.029      | 88.08                 |
| Central African Republic     | Africa        | 661.24         | 9.08                  |
| Chad                         | Africa        | 1768.153       | 1.69                  |
| Chile                        | South America | 22767.037      | 89.55                 |
| China                        | Asia          | 15308.712      | 84.82                 |
| Colombia                     | South America | 13254.949      | 74.26                 |
| Comoros                      | Africa        | 1413.89        | 31.78                 |
| Congo                        | Africa        | 4881.406       | 12.99                 |
| Costa Rica                   | North America | 15524.995      | 76.57                 |
| Cote d'Ivoire                | Africa        | 3601.006       | 12.22                 |
| Croatia                      | Europe        | 22669.797      | 55.15                 |
| Cyprus                       | Europe        | 32415.132      | 71.53                 |
| Czechia                      | Europe        | 32605.906      | 63.41                 |
| Democratic Republic of Congo | Africa        | 808.133        | 0.24                  |
| Denmark                      | Europe        | 46682.515      | 82.29                 |
| Djibouti                     | Africa        | 2705.406       | 10.87                 |

|                    |               |           |       |
|--------------------|---------------|-----------|-------|
| Dominica           | North America | 9673.367  | 40.77 |
| Dominican Republic | North America | 14600.861 | 63.29 |
| Ecuador            | South America | 10581.936 | 78.49 |
| Egypt              | Africa        | 10550.206 | 30.79 |
| El Salvador        | North America | 7292.458  | 68.68 |
| Equatorial Guinea  | Africa        | 22604.873 | 17.19 |
| Estonia            | Europe        | 29481.252 | 63.35 |
| Eswatini           | Africa        | 7738.975  | 28.38 |
| Ethiopia           | Africa        | 1729.927  | 7.89  |
| Fiji               | Oceania       | 8702.975  | 73.26 |
| Finland            | Europe        | 40585.721 | 78.3  |
| France             | Europe        | 38605.671 | 77.98 |
| Gabon              | Africa        | 16562.413 | 17.24 |
| Gambia             | Africa        | 1561.767  | 9.81  |
| Georgia            | Asia          | 9745.079  | 33.43 |
| Germany            | Europe        | 45229.245 | 73.19 |
| Ghana              | Africa        | 4227.63   | 18.2  |
| Greece             | Europe        | 24574.382 | 71.46 |
| Grenada            | North America | 13593.877 | 36.33 |
| Guatemala          | North America | 7423.808  | 35.47 |
| Guinea             | Africa        | 1998.926  | 12.89 |
| Guinea-Bissau      | Africa        | 1548.675  | 19.33 |
| Guyana             | South America | 7435.047  | 55.68 |
| Haiti              | North America | 1653.173  | 1.06  |
| Honduras           | North America | 4541.795  | 49.1  |
| Hong Kong          | Asia          | 56054.92  | 64.23 |
| Hungary            | Europe        | 26777.561 | 64.83 |
| Iceland            | Europe        | 46482.958 | 83.82 |
| India              | Asia          | 6426.674  | 59.91 |
| Indonesia          | Asia          | 11188.744 | 56.24 |
| Iran               | Asia          | 19082.62  | 69.54 |
| Iraq               | Asia          | 15663.986 | 20.38 |
| Ireland            | Europe        | 67335.293 | 78.02 |
| Israel             | Asia          | 33132.32  | 69.94 |
| Italy              | Europe        | 35220.084 | 79.68 |
| Jamaica            | North America | 8193.571  | 23.86 |
| Japan              | Asia          | 39002.223 | 79.54 |
| Jordan             | Asia          | 8337.49   | 41.89 |
| Kazakhstan         | Asia          | 24055.588 | 47.02 |
| Kenya              | Africa        | 2993.028  | 11.52 |
| Kiribati           | Oceania       | 1981.132  | 49.01 |
| Kosovo             | Europe        | 9795.834  | 49.49 |
| Kuwait             | Asia          | 65530.537 | 76.92 |
| Kyrgyzstan         | Asia          | 3393.474  | 18.3  |
| Laos               | Asia          | 6397.36   | 50.75 |
| Latvia             | Europe        | 25063.846 | 70.03 |
| Lebanon            | Asia          | 13367.565 | 32.46 |
| Lesotho            | Africa        | 2851.153  | 30.05 |
| Liberia            | Africa        | 752.788   | 15.15 |
| Libya              | Africa        | 17881.509 | 26.24 |

|                                  |               |            |       |
|----------------------------------|---------------|------------|-------|
| Lithuania                        | Europe        | 29524.265  | 70.98 |
| Luxembourg                       | Europe        | 94277.965  | 16.31 |
| Macao                            | Asia          | 104861.851 | 74.68 |
| Madagascar                       | Africa        | 1416.44    | 2.07  |
| Malawi                           | Africa        | 1095.042   | 7.28  |
| Malaysia                         | Asia          | 26808.164  | 79.21 |
| Maldives                         | Asia          | 15183.616  | 72.94 |
| Mali                             | Africa        | 2014.306   | 4.15  |
| Malta                            | Europe        | 36513.323  | 85.31 |
| Mauritania                       | Africa        | 3597.633   | 23.41 |
| Mauritius                        | Africa        | 20292.745  | 73.59 |
| Mexico                           | North America | 17336.469  | 62.88 |
| Moldova                          | Europe        | 5189.972   | 13.94 |
| Mongolia                         | Asia          | 11840.846  | 68.04 |
| Montenegro                       | Europe        | 16409.288  | 44.97 |
| Morocco                          | Africa        | 7485.013   | 65.9  |
| Mozambique                       | Africa        | 1136.103   | 24.39 |
| Myanmar                          | Asia          | 5591.597   | 34.36 |
| Namibia                          | Africa        | 9541.808   | 15.45 |
| Nauru                            | Oceania       | 12895.635  | 70.01 |
| Nepal                            | Asia          | 2442.804   | 41.28 |
| Netherlands                      | Europe        | 48472.545  | 72.93 |
| New Zealand                      | Oceania       | 36085.843  | 77.52 |
| Nicaragua                        | North America | 5321.444   | 69.06 |
| Niger                            | Africa        | 926        | 2.02  |
| Nigeria                          | Africa        | 5338.454   | 4.37  |
| North Macedonia                  | Europe        | 13111.214  | 40.35 |
| Norway                           | Europe        | 64800.057  | 78.3  |
| Oman                             | Asia          | 37960.709  | 59.76 |
| Pakistan                         | Asia          | 5034.708   | 40.89 |
| Palestine                        | Asia          | 4449.898   | 39.31 |
| Panama                           | North America | 22267.037  | 69.01 |
| Papua New Guinea                 | Oceania       | 3823.194   | 3.11  |
| Paraguay                         | South America | 8827.01    | 47.71 |
| Peru                             | South America | 12236.706  | 72.2  |
| Philippines                      | Asia          | 7599.188   | 50.53 |
| Poland                           | Europe        | 27216.445  | 56.94 |
| Portugal                         | Europe        | 27936.896  | 90.28 |
| Qatar                            | Asia          | 116935.6   | 80.54 |
| Romania                          | Europe        | 23313.199  | 28.64 |
| Russia                           | Europe        | 24765.954  | 49.73 |
| Rwanda                           | Africa        | 1854.211   | 55.16 |
| Saint Kitts and Nevis            | North America | 24654.385  | 51.4  |
| Saint Lucia                      | North America | 12951.839  | 30.11 |
| Saint Vincent and the Grenadines | North America | 10727.146  | 29.94 |
| Samoa                            | Oceania       | 6021.557   | 70.66 |
| San Marino                       | Europe        | 56861.47   | 71.47 |
| Sao Tome and Principe            | Africa        | 3052.714   | 38.68 |
| Saudi Arabia                     | Asia          | 49045.411  | 70.55 |
| Senegal                          | Africa        | 2470.58    | 7.72  |

|                           |               |           |       |
|---------------------------|---------------|-----------|-------|
| Serbia                    | Europe        | 14048.881 | 48.06 |
| Seychelles                | Africa        | 26382.287 | 83.23 |
| Sierra Leone              | Africa        | 1390.3    | 9.18  |
| Singapore                 | Asia          | 85535.383 | 88    |
| Sint Maarten (Dutch part) | North America | 36327.232 | 62.38 |
| Slovakia                  | Europe        | 30155.152 | 49.66 |
| Slovenia                  | Europe        | 31400.84  | 60.01 |
| Solomon Islands           | Oceania       | 2205.923  | 25.56 |
| South Africa              | Africa        | 12294.876 | 46.27 |
| South Korea               | Asia          | 35938.374 | 85.54 |
| South Sudan               | Africa        | 1569.888  | 2     |
| Spain                     | Europe        | 34272.36  | 84.3  |
| Sri Lanka                 | Asia          | 11669.077 | 74.33 |
| Sudan                     | Africa        | 4466.507  | 8.94  |
| Suriname                  | South America | 13767.119 | 44.1  |
| Sweden                    | Europe        | 46949.283 | 76.15 |
| Switzerland               | Europe        | 57410.166 | 68.34 |
| Tajikistan                | Asia          | 2896.913  | 36.11 |
| Tanzania                  | Africa        | 2683.304  | 2.59  |
| Thailand                  | Asia          | 16277.671 | 72.58 |
| Timor                     | Asia          | 6570.102  | 49.33 |
| Togo                      | Africa        | 1429.813  | 16.12 |
| Tonga                     | Oceania       | 5425.621  | 68.95 |
| Trinidad and Tobago       | North America | 28763.071 | 50.4  |
| Tunisia                   | Africa        | 10849.297 | 54.98 |
| Turkey                    | Asia          | 25129.341 | 66.76 |
| Turkmenistan              | Asia          | 16389.023 | 71.51 |
| Tuvalu                    | Oceania       | 3575.104  | 52.24 |
| Uganda                    | Africa        | 1697.707  | 17.73 |
| Ukraine                   | Europe        | 7894.393  | 33.53 |
| United Arab Emirates      | Asia          | 67293.483 | 98.99 |
| United Kingdom            | Europe        | 39753.244 | 75.72 |
| United States             | North America | 54225.446 | 72.75 |
| Uruguay                   | South America | 20551.409 | 79.3  |
| Uzbekistan                | Asia          | 6253.104  | 38.13 |
| Vanuatu                   | Oceania       | 2921.909  | 32.53 |
| Venezuela                 | South America | 16745.022 | 64.08 |
| Vietnam                   | Asia          | 6171.884  | 76.04 |
| Yemen                     | Asia          | 1479.147  | 1.83  |
| Zambia                    | Africa        | 3689.251  | 4.26  |
| Zimbabwe                  | Africa        | 1899.775  | 27.14 |

| People Fully Vaccinated (%) | Population |
|-----------------------------|------------|
| 8.95                        | 39835428   |
| 35.45                       | 2872934    |
| 12.45                       | 44616626   |
| 11.03                       | 33933611   |
| 59.26                       | 98728      |
| 70.4                        | 45605823   |
| 21.66                       | 2968128    |
| 73.52                       | 107195     |
| 76.31                       | 25788217   |
| 70.77                       | 9043072    |
| 45.54                       | 10223344   |
| 37.17                       | 396914     |
| 67.09                       | 1748295    |
| 26.9                        | 166303494  |
| 49.6                        | 287708     |
| 34.19                       | 9442867    |
| 75.55                       | 11632334   |
| 48.95                       | 404915     |
| 9.63                        | 12451031   |
| 72.82                       | 62092      |
| 72.46                       | 779900     |
| 38.09                       | 11832936   |
| 22.08                       | 3263459    |
| 41.95                       | 2397240    |
| 66.74                       | 213993441  |
| 87.29                       | 441532     |
| 15.76                       | 6896655    |
| 3.02                        | 21497097   |
| 0.03                        | 12255429   |
| 80.35                       | 16946446   |
| 2.3                         | 27224262   |
| 77.11                       | 38067913   |
| 45.55                       | 561901     |
| 85.51                       | 66498      |
| 6.99                        | 4919987    |
| 0.48                        | 16914985   |
| 85.64                       | 19212362   |
| 74.53                       | 1444216102 |
| 54.08                       | 51265841   |
| 27.55                       | 888456     |
| 9.91                        | 5657017    |
| 67.02                       | 5139053    |
| 5.57                        | 27053629   |
| 51.9                        | 4081657    |
| 67.2                        | 896005     |
| 61.69                       | 10724553   |
| 0.11                        | 92377986   |
| 78.03                       | 5813302    |
| 2.6                         | 1002197    |

|       |            |
|-------|------------|
| 38.27 | 72172      |
| 51.94 | 10953714   |
| 67.88 | 17888474   |
| 18.78 | 104258327  |
| 63.61 | 6518500    |
| 14.03 | 1449891    |
| 61.36 | 1325188    |
| 25.55 | 1172369    |
| 1.24  | 117876226  |
| 67.07 | 902899     |
| 74.3  | 5548361    |
| 72.72 | 67564251   |
| 7.6   | 2278829    |
| 9.25  | 2486937    |
| 27.92 | 3979773    |
| 70.19 | 83900471   |
| 7.36  | 31732128   |
| 66.77 | 10370747   |
| 31.03 | 113015     |
| 25.13 | 18249868   |
| 6.22  | 13497237   |
| 1.13  | 2015490    |
| 39.78 | 790329     |
| 0.62  | 11541683   |
| 39.28 | 10062994   |
| 61.29 | 7552800    |
| 61.84 | 9634162    |
| 82.61 | 343360     |
| 40.89 | 1393409033 |
| 39.79 | 276361788  |
| 59.2  | 85028760   |
| 13.41 | 41179351   |
| 76.86 | 4982904    |
| 63.21 | 9291000    |
| 73.83 | 60367471   |
| 18.83 | 2973462    |
| 78.12 | 126050796  |
| 37.89 | 10269022   |
| 44.4  | 18994958   |
| 7.02  | 54985702   |
| 18.68 | 121388     |
| 43.71 | 1782115    |
| 74.16 | 4328553    |
| 14.87 | 6628347    |
| 42    | 7379358    |
| 67.09 | 1866934    |
| 26.57 | 6769151    |
| 29.69 | 2159067    |
| 14.58 | 5180208    |
| 11.39 | 6958538    |

|       |           |
|-------|-----------|
| 67.78 | 2689862   |
| 5.97  | 634814    |
| 69.57 | 658391    |
| 1.9   | 28427333  |
| 3.39  | 19647681  |
| 78.02 | 32776195  |
| 67.46 | 543620    |
| 1.8   | 20855724  |
| 84.3  | 516100    |
| 15.09 | 4775110   |
| 71.36 | 1273428   |
| 55.77 | 130262220 |
| 13.14 | 4024025   |
| 64.94 | 3329282   |
| 42.96 | 628051    |
| 61.49 | 37344787  |
| 16.8  | 32163045  |
| 23.77 | 54806014  |
| 13.01 | 2587344   |
| 66.69 | 10873     |
| 32.81 | 29674920  |
| 67.04 | 17173094  |
| 74.77 | 5122600   |
| 39.98 | 6702379   |
| 1.85  | 25130810  |
| 2.01  | 211400704 |
| 38.97 | 2082661   |
| 71.59 | 5465629   |
| 55.34 | 5223376   |
| 28.93 | 225199929 |
| 28.31 | 5222756   |
| 56.17 | 4381583   |
| 2.41  | 9119005   |
| 39.77 | 7219641   |
| 62.39 | 33359415  |
| 33.64 | 111046910 |
| 55.35 | 37797000  |
| 89.31 | 10167923  |
| 75.7  | 2930524   |
| 27.91 | 19127772  |
| 44.61 | 145912022 |
| 37.19 | 13276517  |
| 47.44 | 53546     |
| 26.54 | 184401    |
| 23.11 | 111269    |
| 60.84 | 200144    |
| 63.58 | 34010     |
| 22.93 | 223364    |
| 65.19 | 35340680  |
| 5.47  | 17196308  |

|       |           |
|-------|-----------|
| 46.47 | 6871547   |
| 79.1  | 98910     |
| 4.73  | 8141343   |
| 87    | 5453600   |
| 57.83 | 43421     |
| 44.19 | 5460726   |
| 57.05 | 2078723   |
| 7.95  | 703995    |
| 26.23 | 60041996  |
| 82.37 | 51305184  |
| 1.6   | 11381377  |
| 80.93 | 46745211  |
| 64.31 | 21497306  |
| 2.75  | 44909351  |
| 38.35 | 591798    |
| 72.31 | 10160159  |
| 66.64 | 8715494   |
| 28.38 | 9749625   |
| 1.75  | 61498438  |
| 64.07 | 69950844  |
| 39.66 | 1343875   |
| 10.95 | 8478242   |
| 53.04 | 106759    |
| 47.35 | 1403374   |
| 47.22 | 11935764  |
| 60.4  | 85042736  |
| 52.41 | 6117933   |
| 49.34 | 11925     |
| 2.99  | 47123533  |
| 30.82 | 43466822  |
| 90.68 | 9991083   |
| 69.28 | 68207114  |
| 61.19 | 332915074 |
| 76.66 | 3485152   |
| 17.33 | 33935765  |
| 16.03 | 314464    |
| 40.44 | 28704947  |
| 57.44 | 98168829  |
| 1.2   | 30490639  |
| 3.31  | 18920657  |
| 20.57 | 15092171  |
